# Supplementary material for: Changing Metacognitive Appraisal Bias in High-Worriers Through Reappraisal Training
Source: Springer Nature journal article supplement (doi:10.1007/s10608-022-10297-x), 2022-04-29
Supplement: MOESM1 [file 20360180]

**Supplementary Materials**

**Rating Criteria for Sentence Completion Task**

| Rating Category | Criteria |
| --- | --- |
| Positive | Descriptions including positive attributes, signs of positive affect, nouns referring to something positive, a positive personal evaluation or appreciation (e.g., success) |
| Neutral | Mere descriptions of a situation or bodily sensation without referring to any particular emotional or disorder-relevant evaluation or content (e.g., cold) |
| Negative | Descriptions including negative attributes, signs of negative affect, downward comparisons, nouns referring to something negative, a negative personal evaluation or depreciation (e.g., failed). |
| Non-codable | Descriptions including excessive typos that made the ending incomprehensible. Sentences that had not been answered according to the task instructions (e.g., writing several sentences instead of a single ending) |

Table S1.

|  | Breathing 1 | Breathing 2 | Breathing 3 | Breathing 4 | Self-ratings | External ratings |
| --- | --- | --- | --- | --- | --- | --- |
| Breathing 1 | .017 |  |  |  |  |  |
| Breathing 2 | -.021 | .043 |  |  |  |  |
| Breathing 3 | -.013 | .013 | .029 |  |  |  |
| Breathing 4 | -.012 | .014 | .021 | .030 |  |  |
| Self-ratings | -.078 | .070 | .119 | .078 | .772 |  |
| External ratings | -.079 | .057 | .130 | .102 | .823 | .855 |

*Random Effects Covariance Matrix Level 1-units (Within-Subject Variance)*

*Note*. Standard Errors are not reported as the standard *t*-test is not applicable to the test of variances. Breathing 1: attention focus on one’s breathing; Breathing 2: experienced difficulty to focus attention; Breathing 3: level of distraction; Breathing 4: time experienced worrying.

Table S2.

*Random Effects Covariance Matrix Level 2-units (Between-Subject Variance)*

|  | Self-ratings | External ratings | Breathing 1 | Breathing 2 | Breathing 3 | Breathing 4 |
| --- | --- | --- | --- | --- | --- | --- |
| Self-ratings |  |  |  |  |  |  |
| External ratings |  | .885 * |  |  |  |  |
| Breathing 1 |  |  | .020 |  |  |  |
| Breathing 2 |  |  | -.017 | .031 |  |  |
| Breathing 3 |  |  | -.012 | .014 | .024 |  |
| Breathing 4 |  |  | -.013 | .016 | .015 | .024 |

*Note*. Standard Errors are not reported as the standard *t*-test is not applicable to the test of variances. Breathing 1: attention focus on one’s breathing; Breathing 2: experienced difficulty to focus attention; Breathing 3: level of distraction; Breathing 4: time experienced worrying.
